# Supplementary material for: Metabolic pathways of the wheat (Triticum aestivum) endosperm amyloplast revealed by proteomics
Source: Springer Nature journal article supplement (doi:10.1186/1471-2229-8-39), 2008-01-01
Supplement: Additional file 3 [file 1471-2229-8-39-s3.pdf]

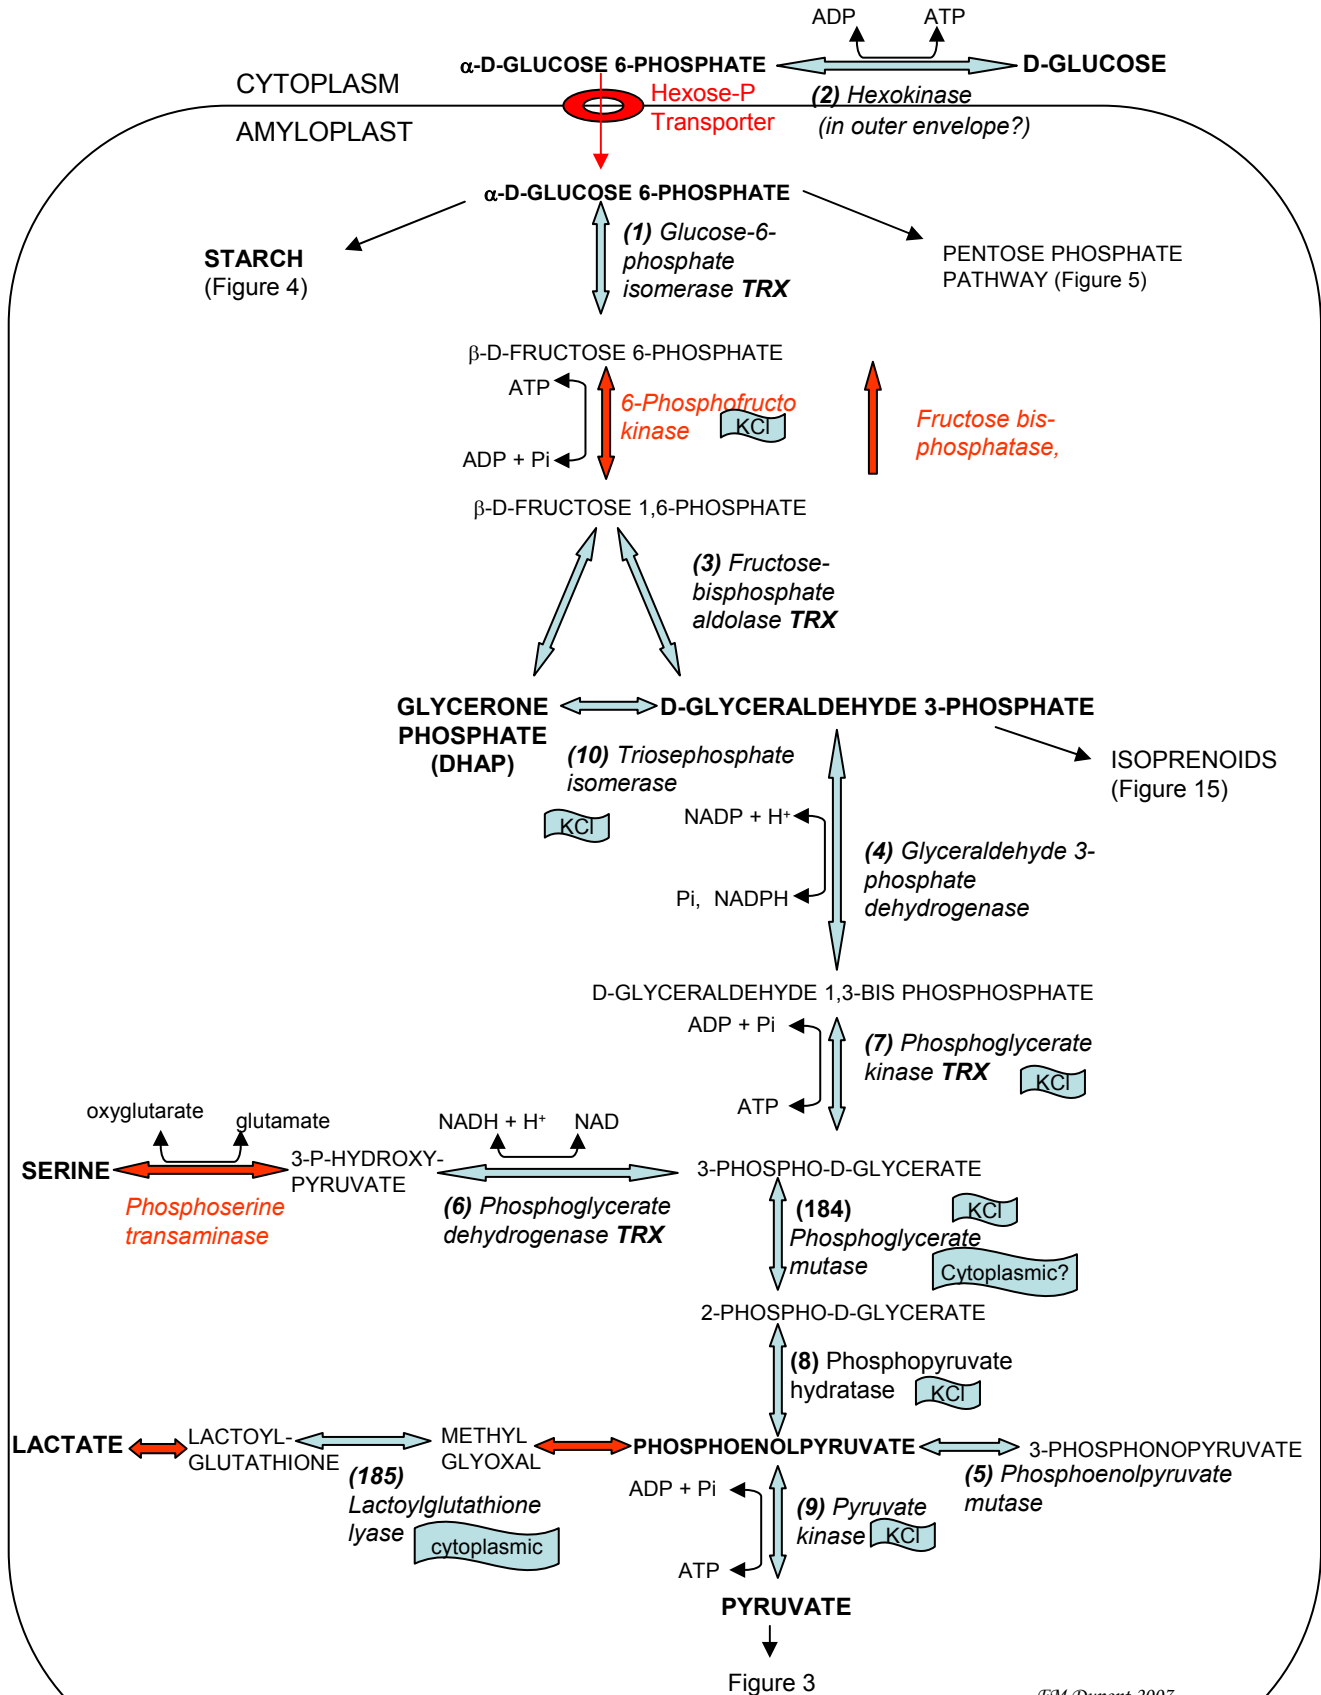

**Figure 2. Glucose metabolism and glycolysis.** Details of symbols and meaning of colors for all figures are given in Fig. 3. Hexokinase may be in the outer envelope, or within the plastid.

## Pyruvate Dehydrogenase

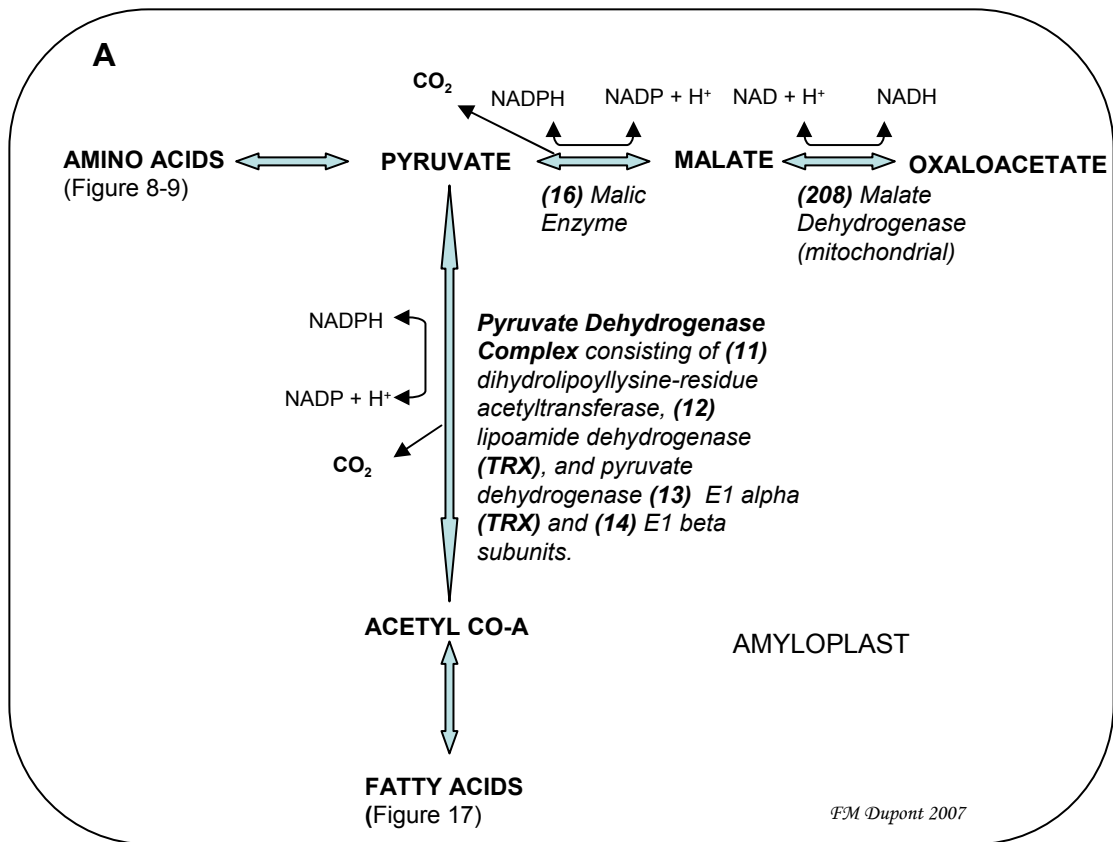

### Citric Acid Cycle

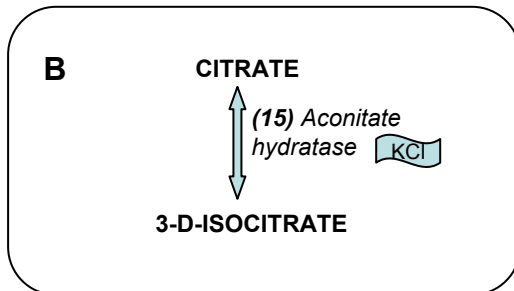

### C. Legend for All Figures

**Black font** indicates that enzyme was detected in the amyloplast preparation, regardless of cellular location.

**Red font** indicates that enzyme was not detected in the amyloplast preparation.

KCl indicates that enzyme was previously detected in the KCl extract

Cytoplasmic indicates that enzyme is thought to be cytoplasmic.

**TRX** indicates that enzyme was identified as a thioredoxin target.

**Figure 3 . A. Pyruvate dehydrogenase. B. Citric acid cycle components C. Legend for all figures.**

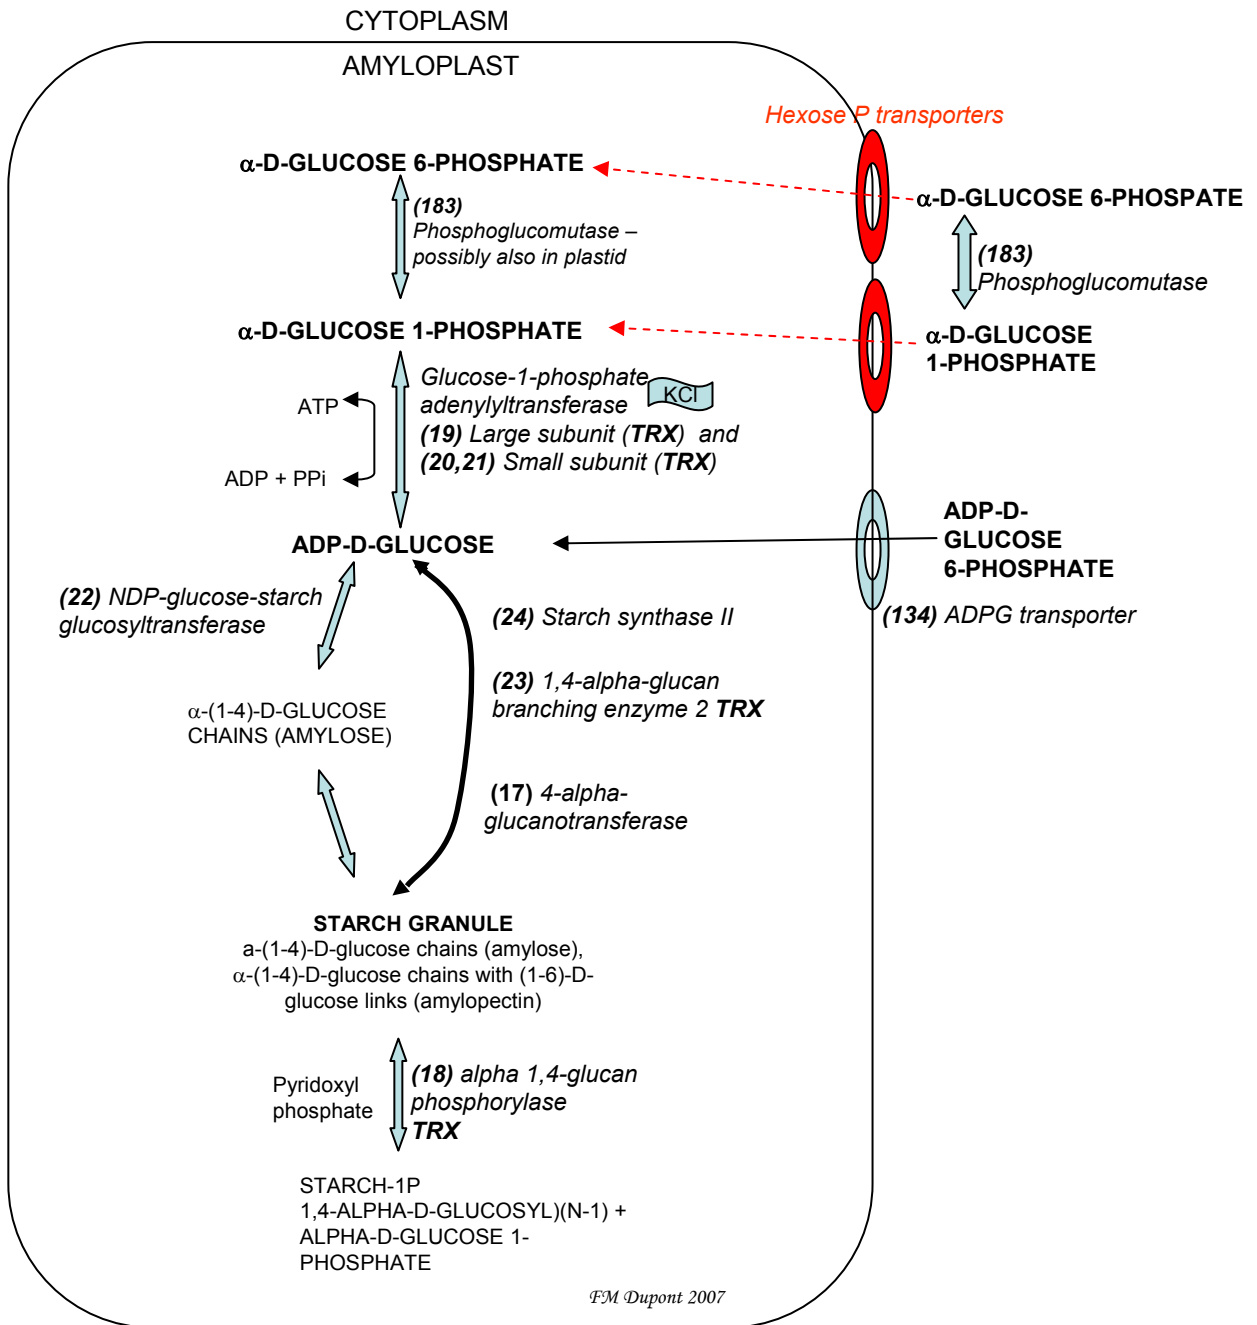

**Figure 4. Starch biosynthesis.**

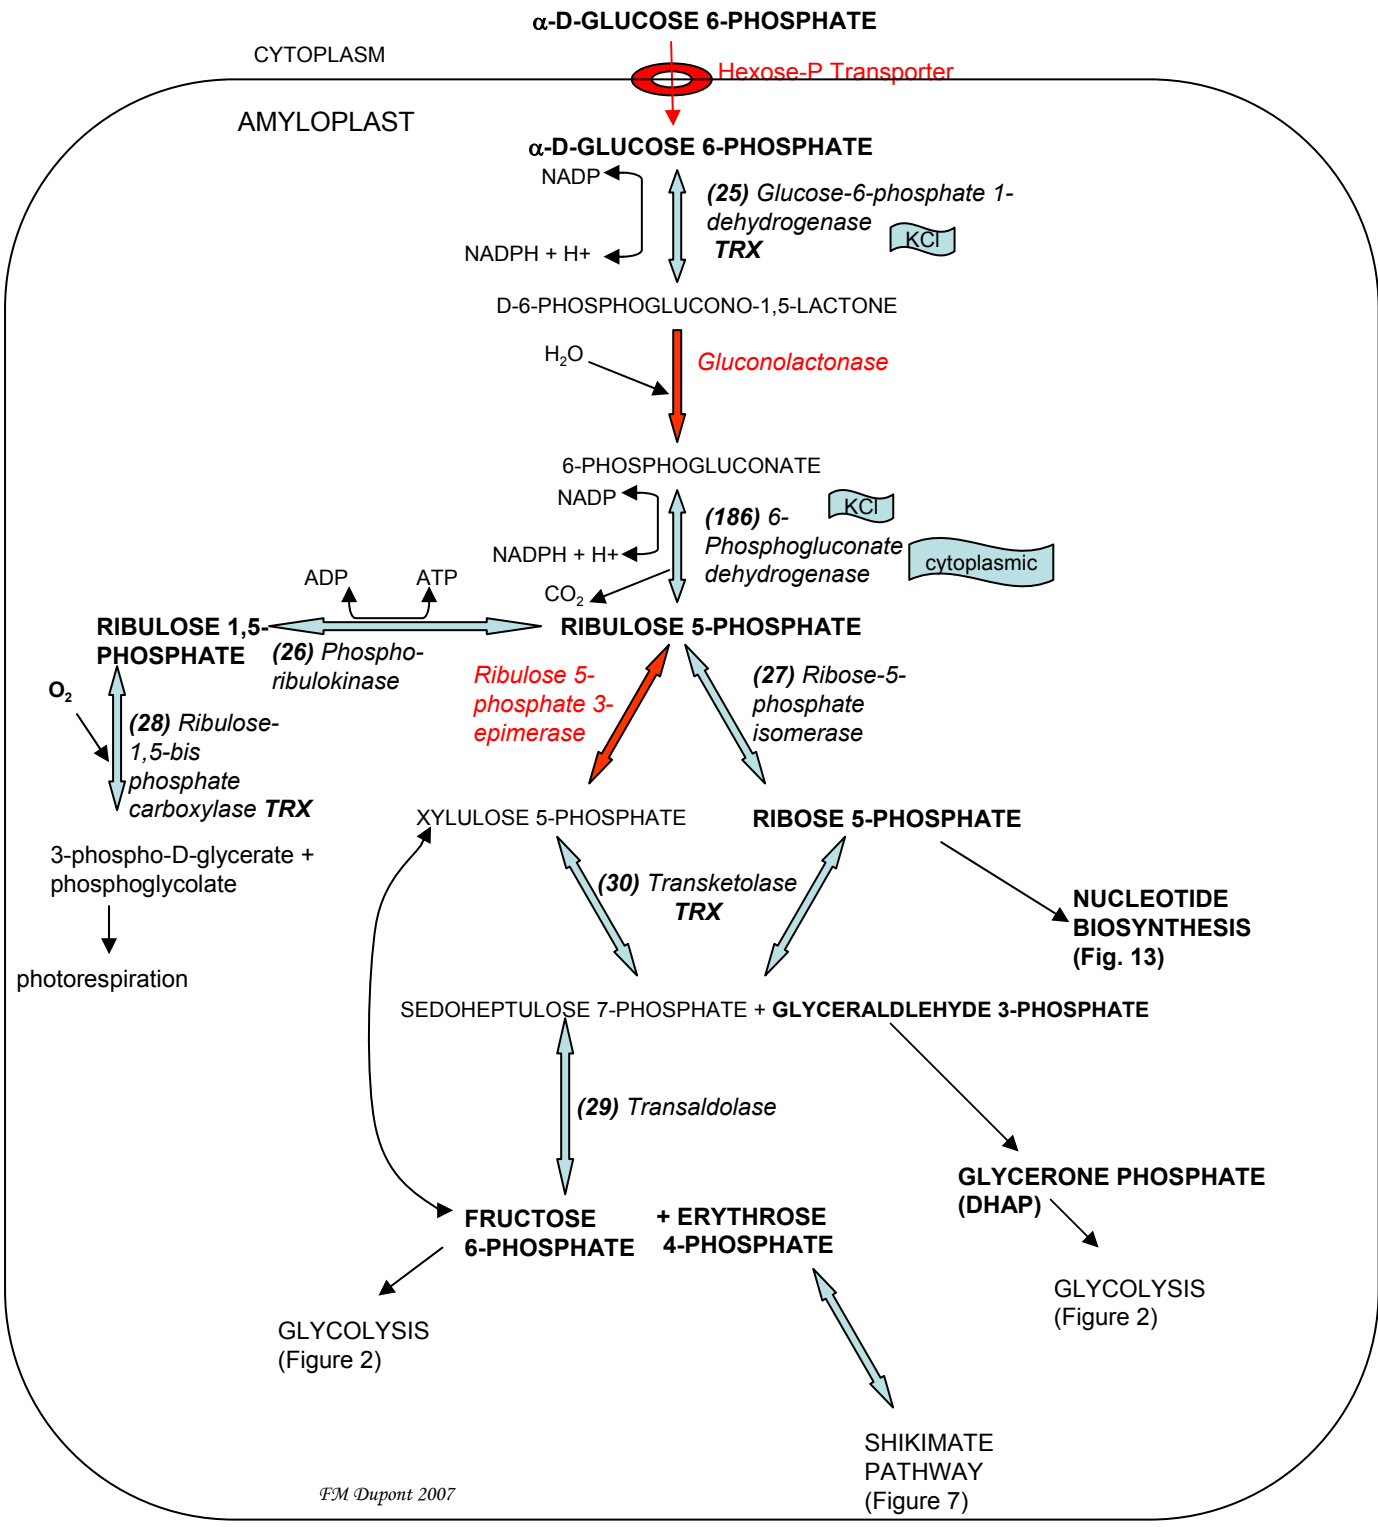

EM Dupont 2007

Figure 5. Pentose phosphate pathway.

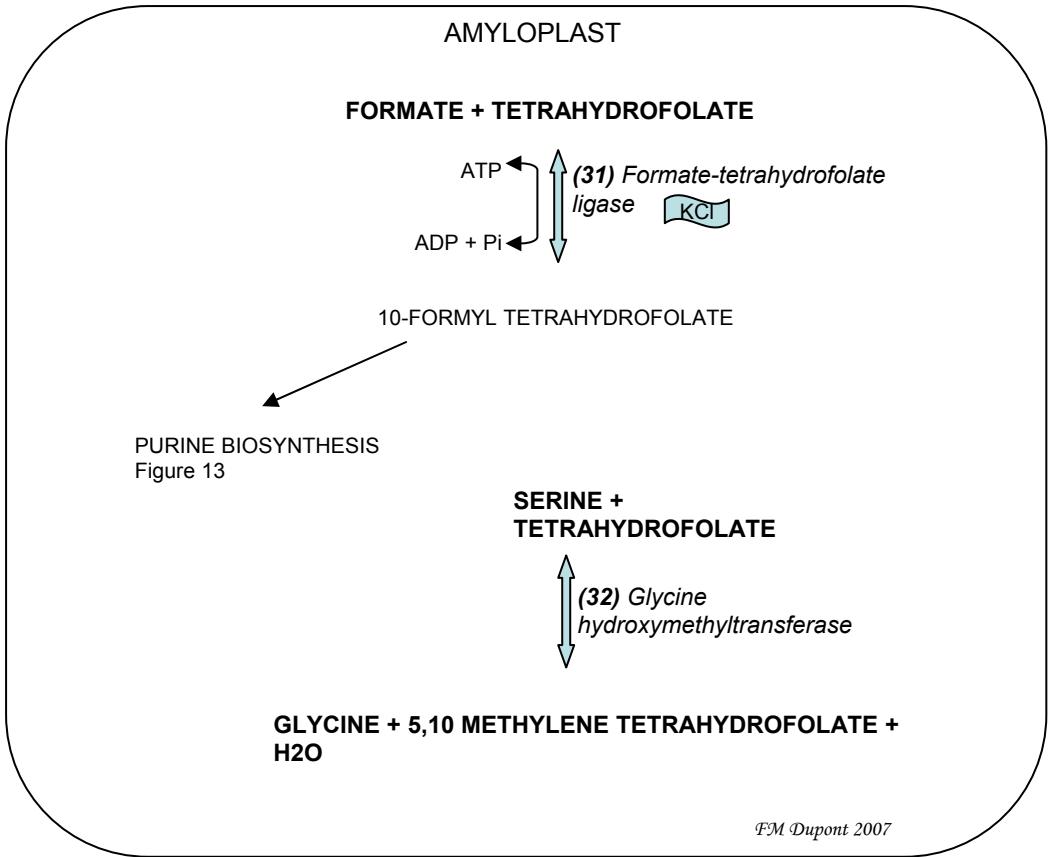

**Figure 6. Folate 1-carbon metabolism.**

AMYLOPLAST

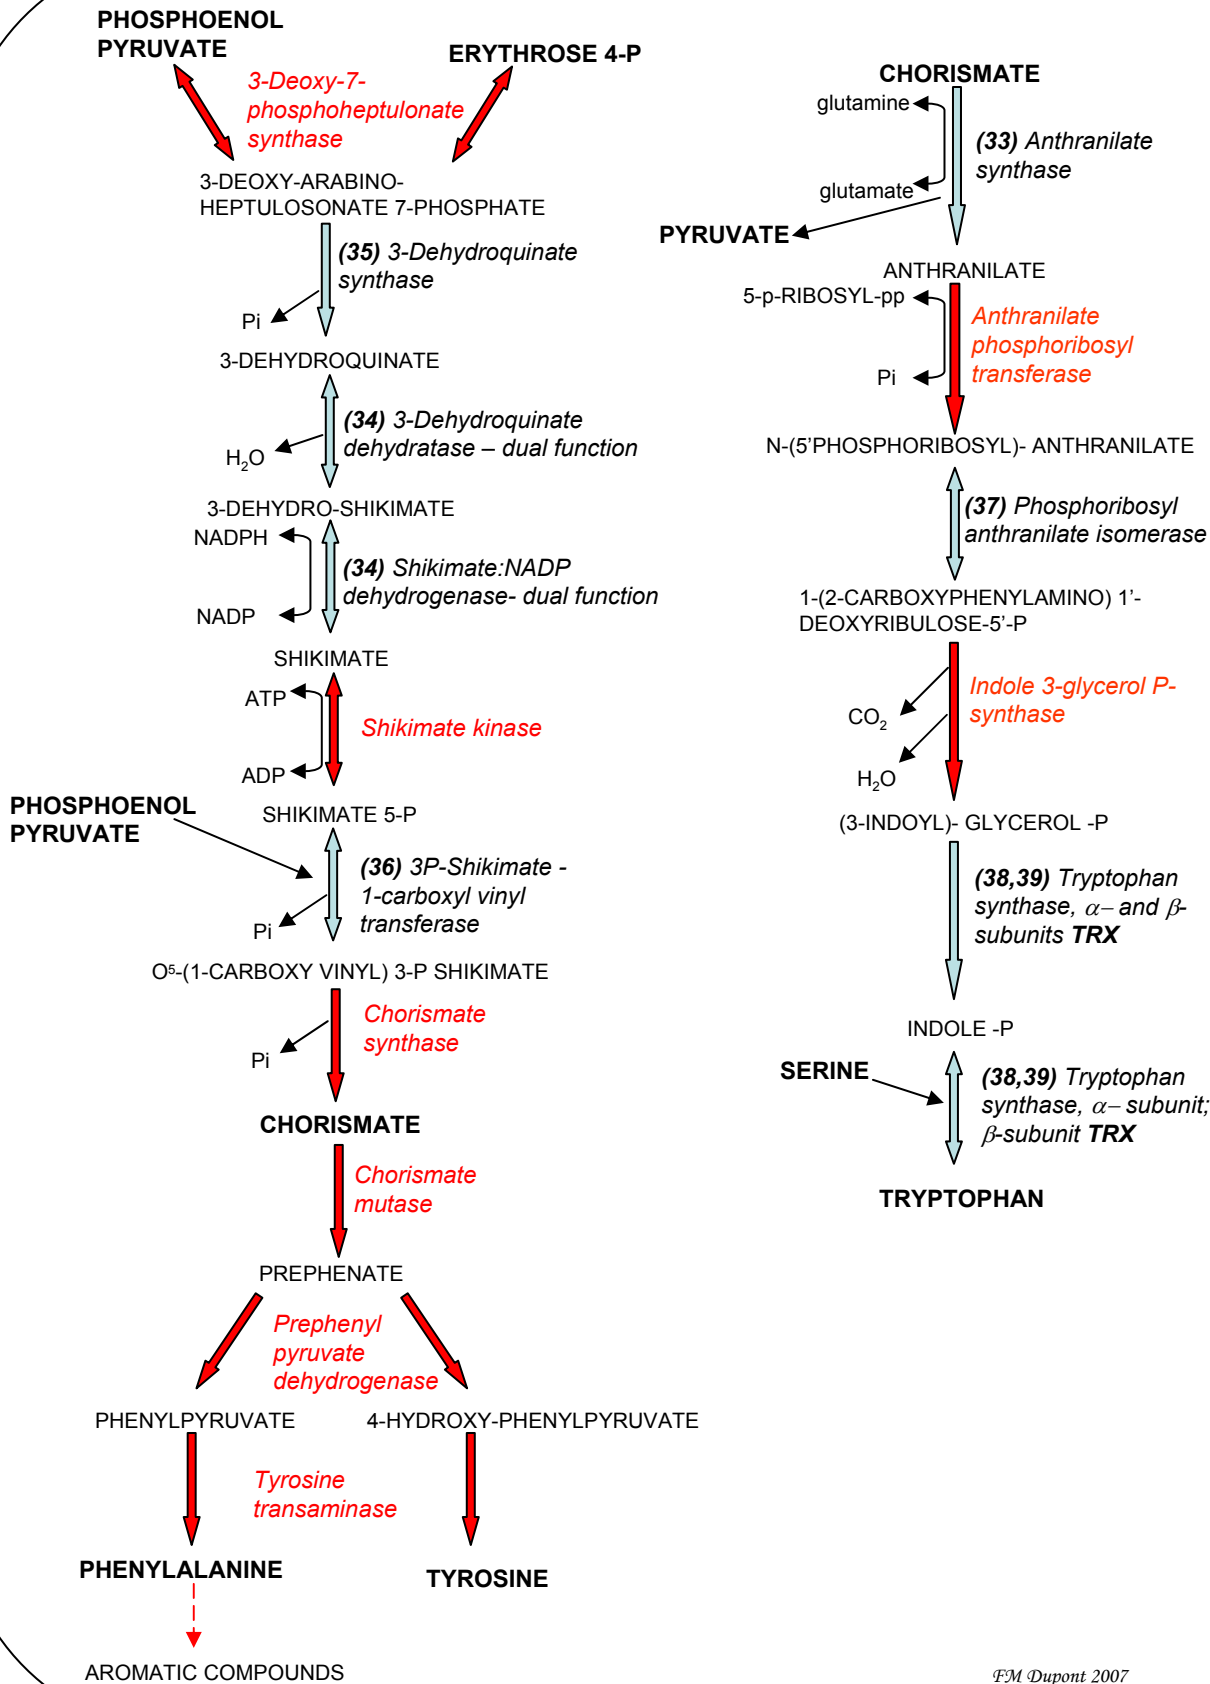

FM Dupont 2007

Figure 7. Aromatic amino acid synthesis.

AMYLOPLAST

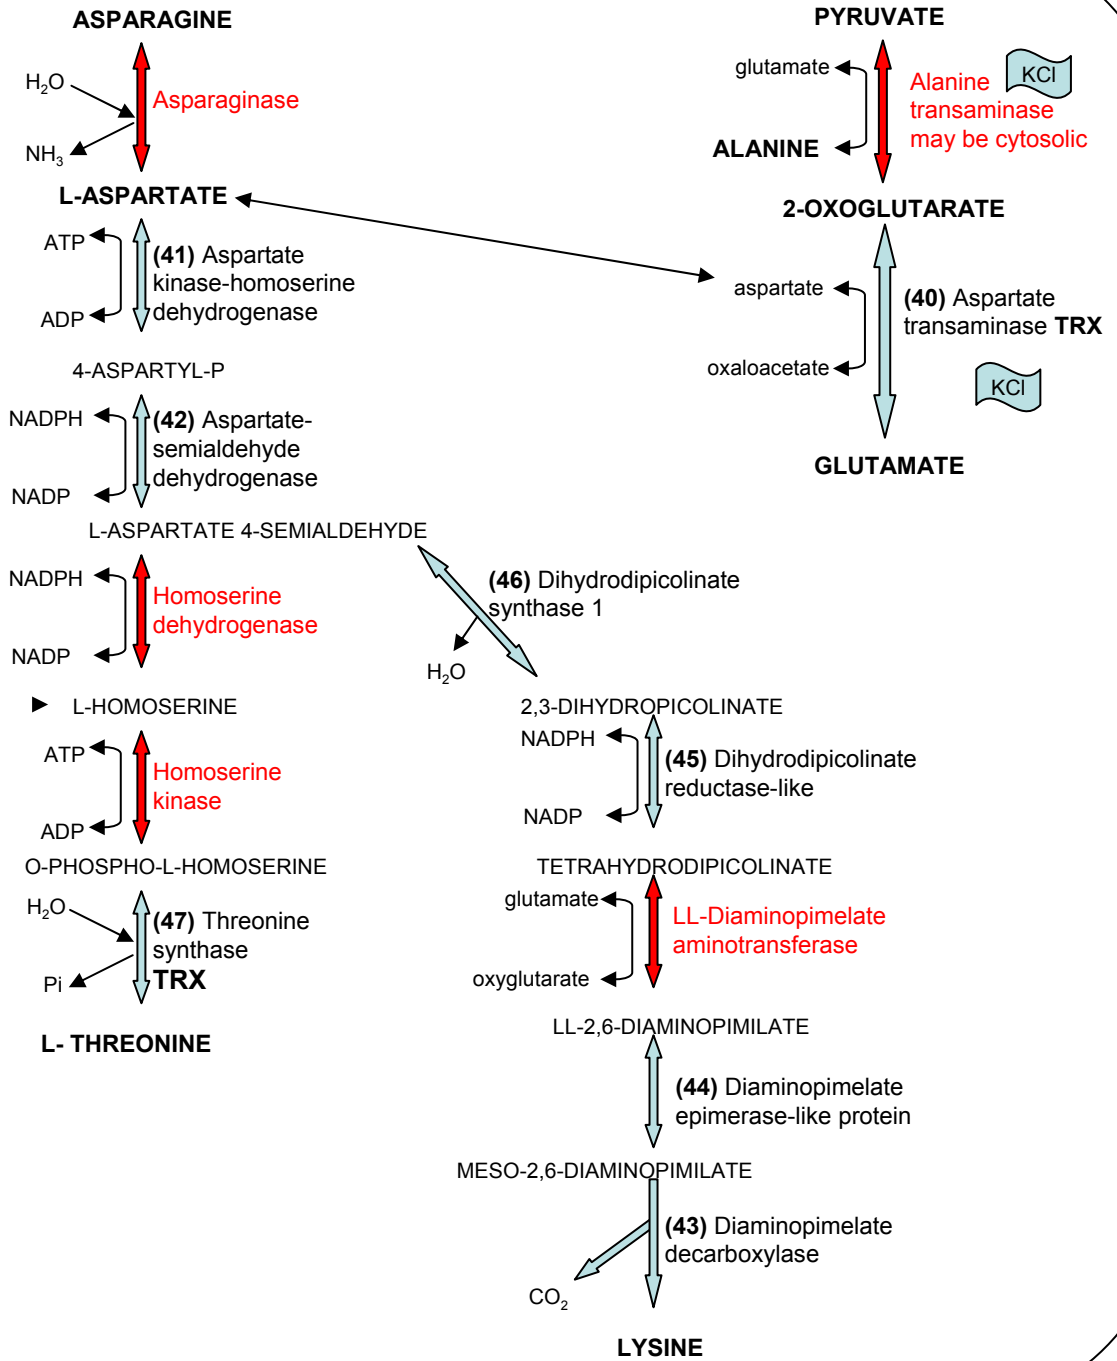

EM Dupont 2007

Figure 8. Aspartate family of amino acids.

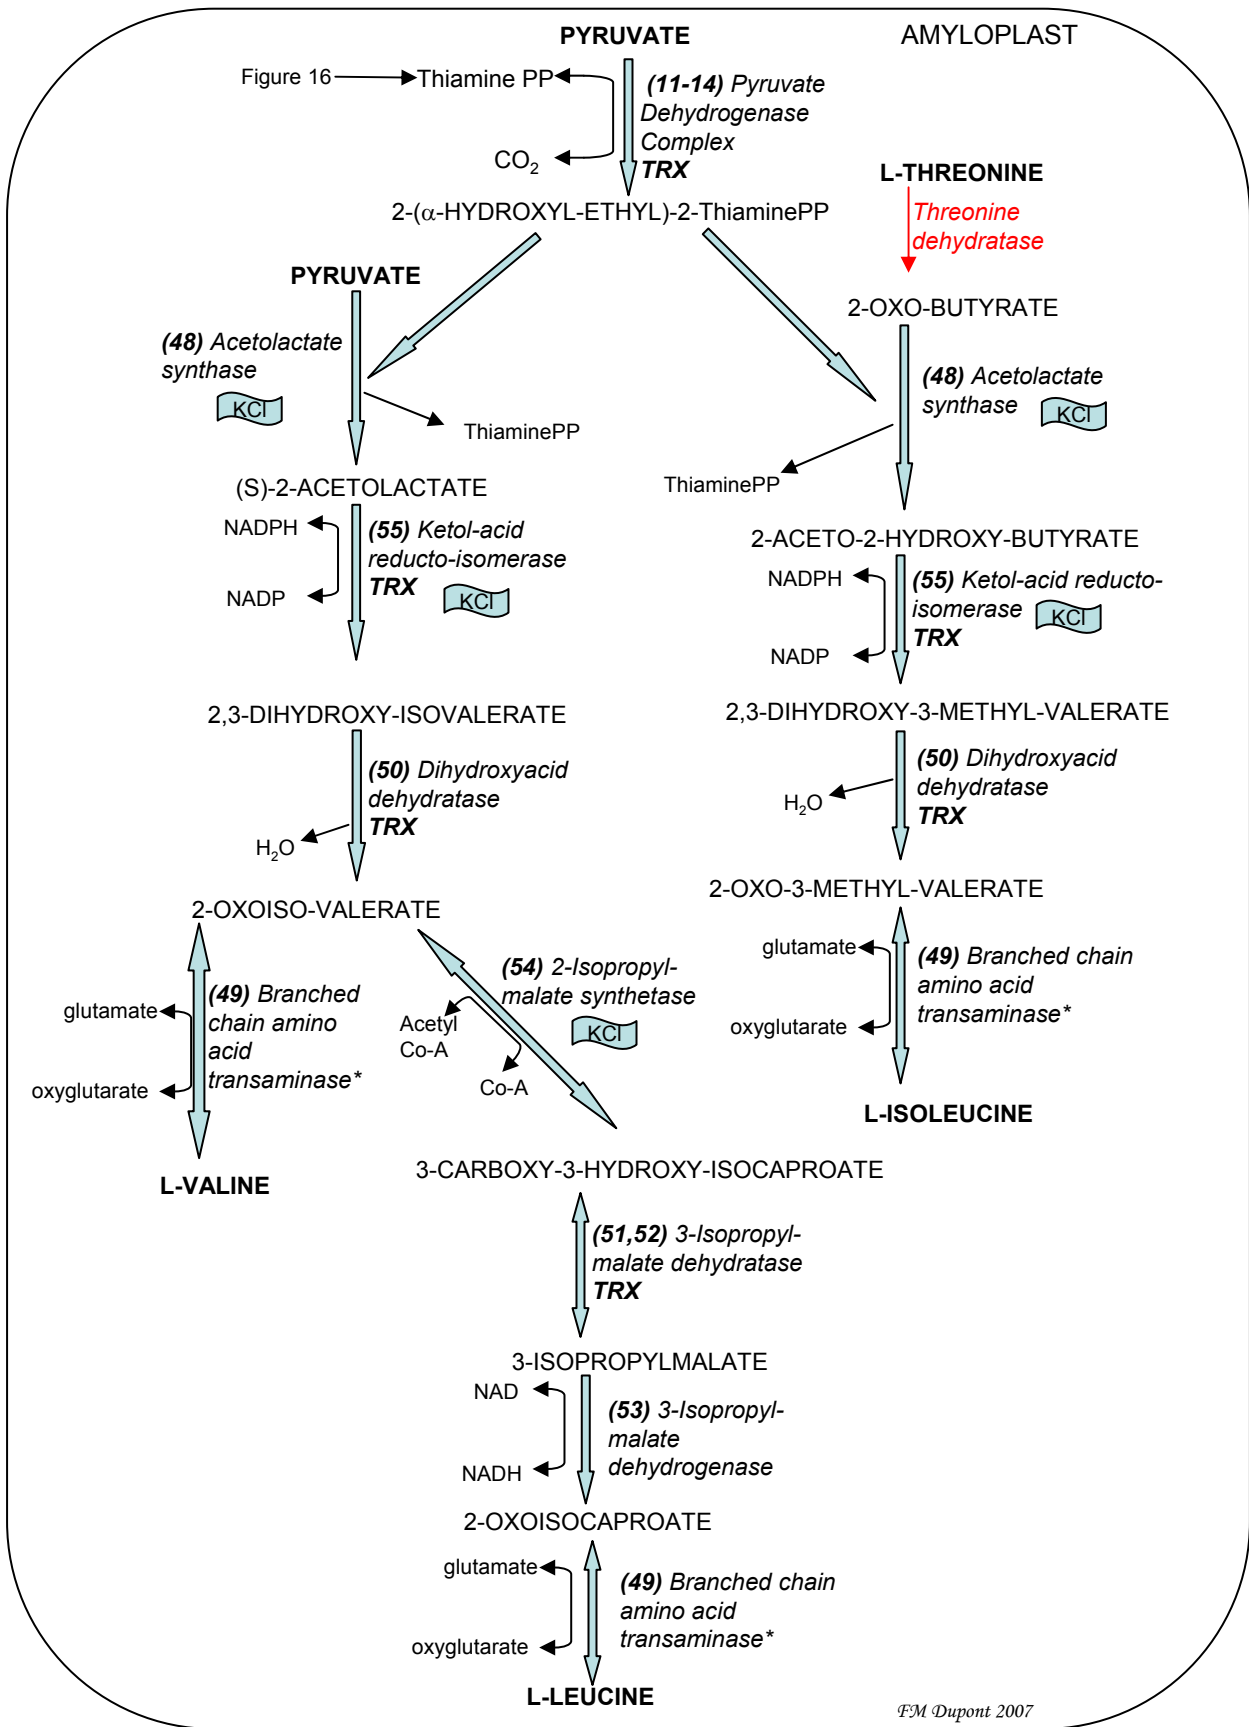

**Figure 9. Branched chain family of amino acids.**



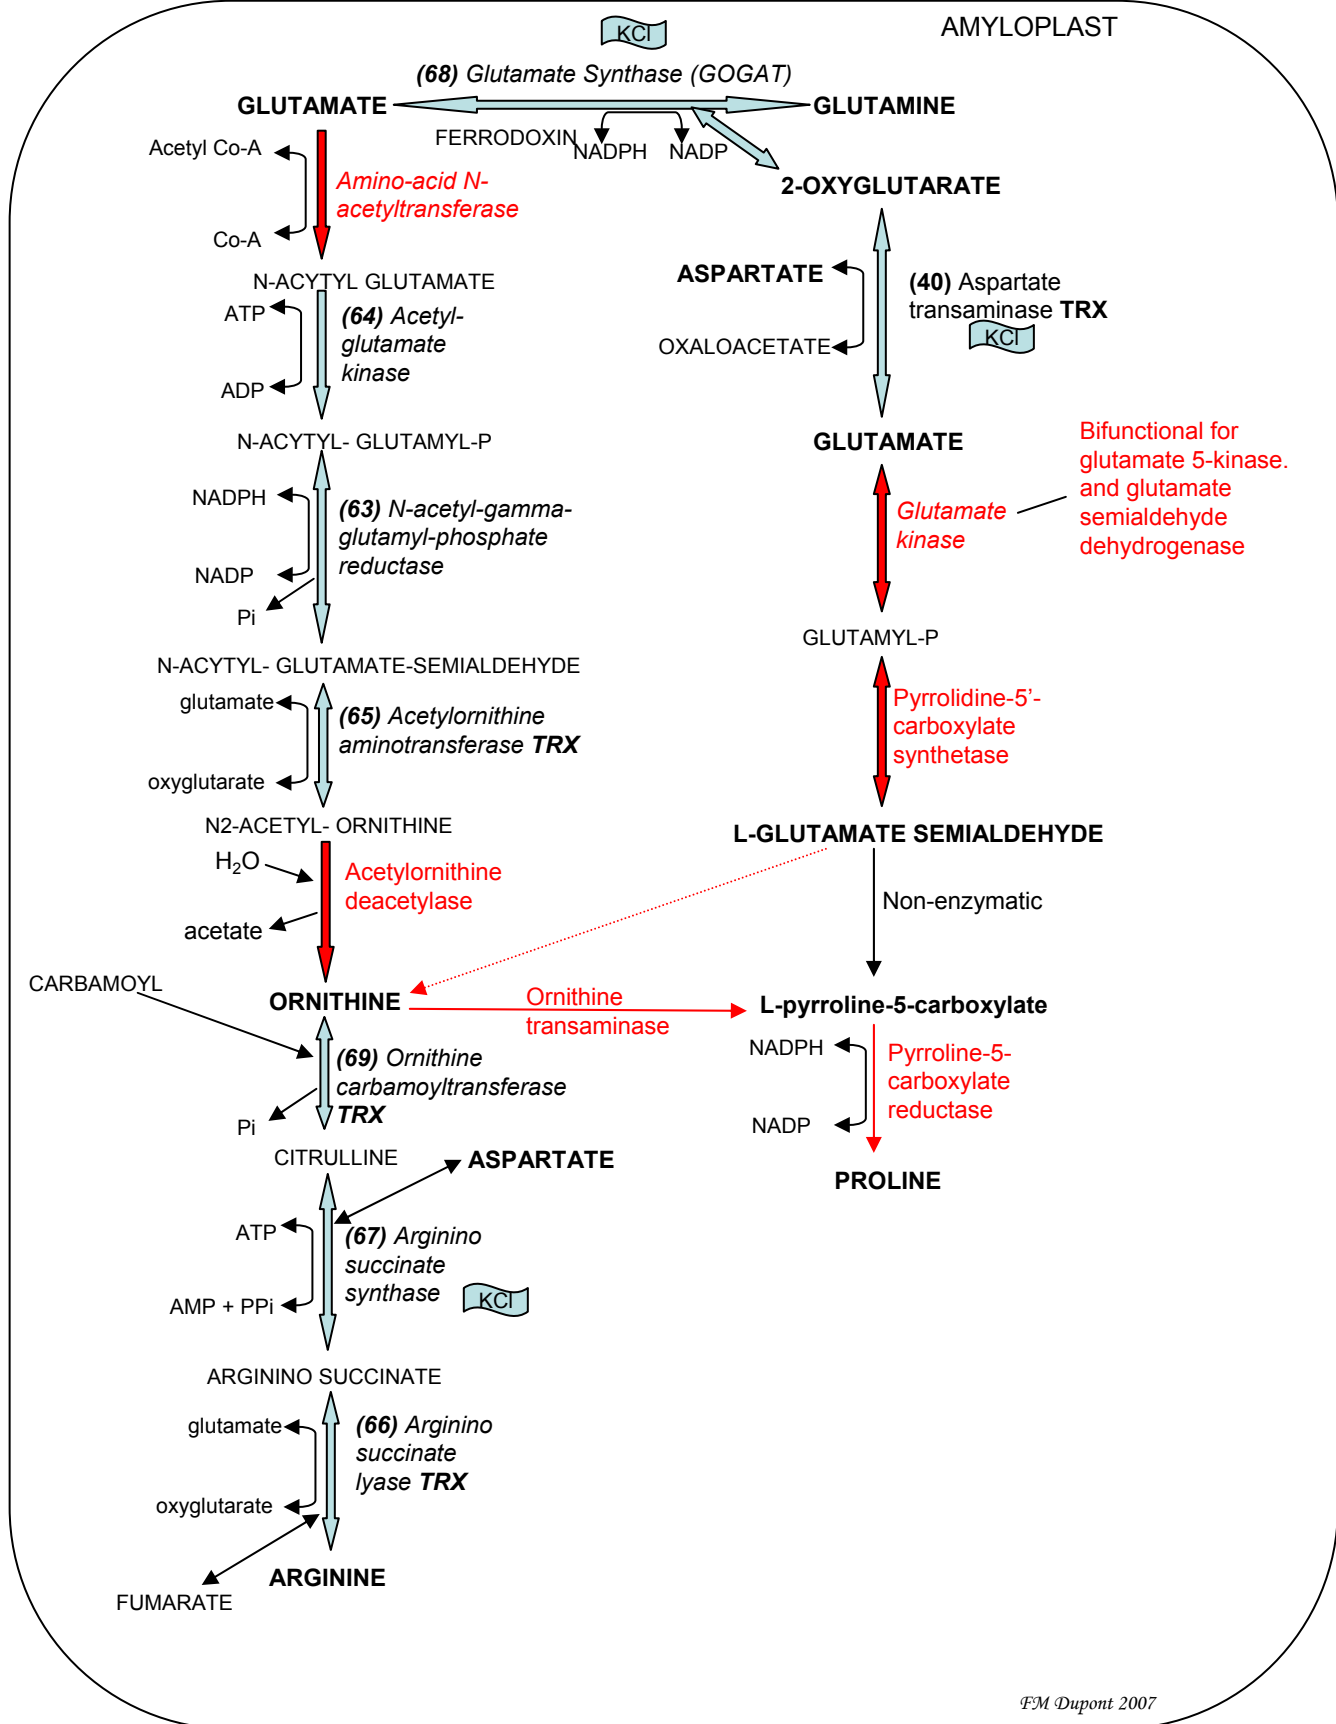

Figure 11. Glutamate family of amino acids.

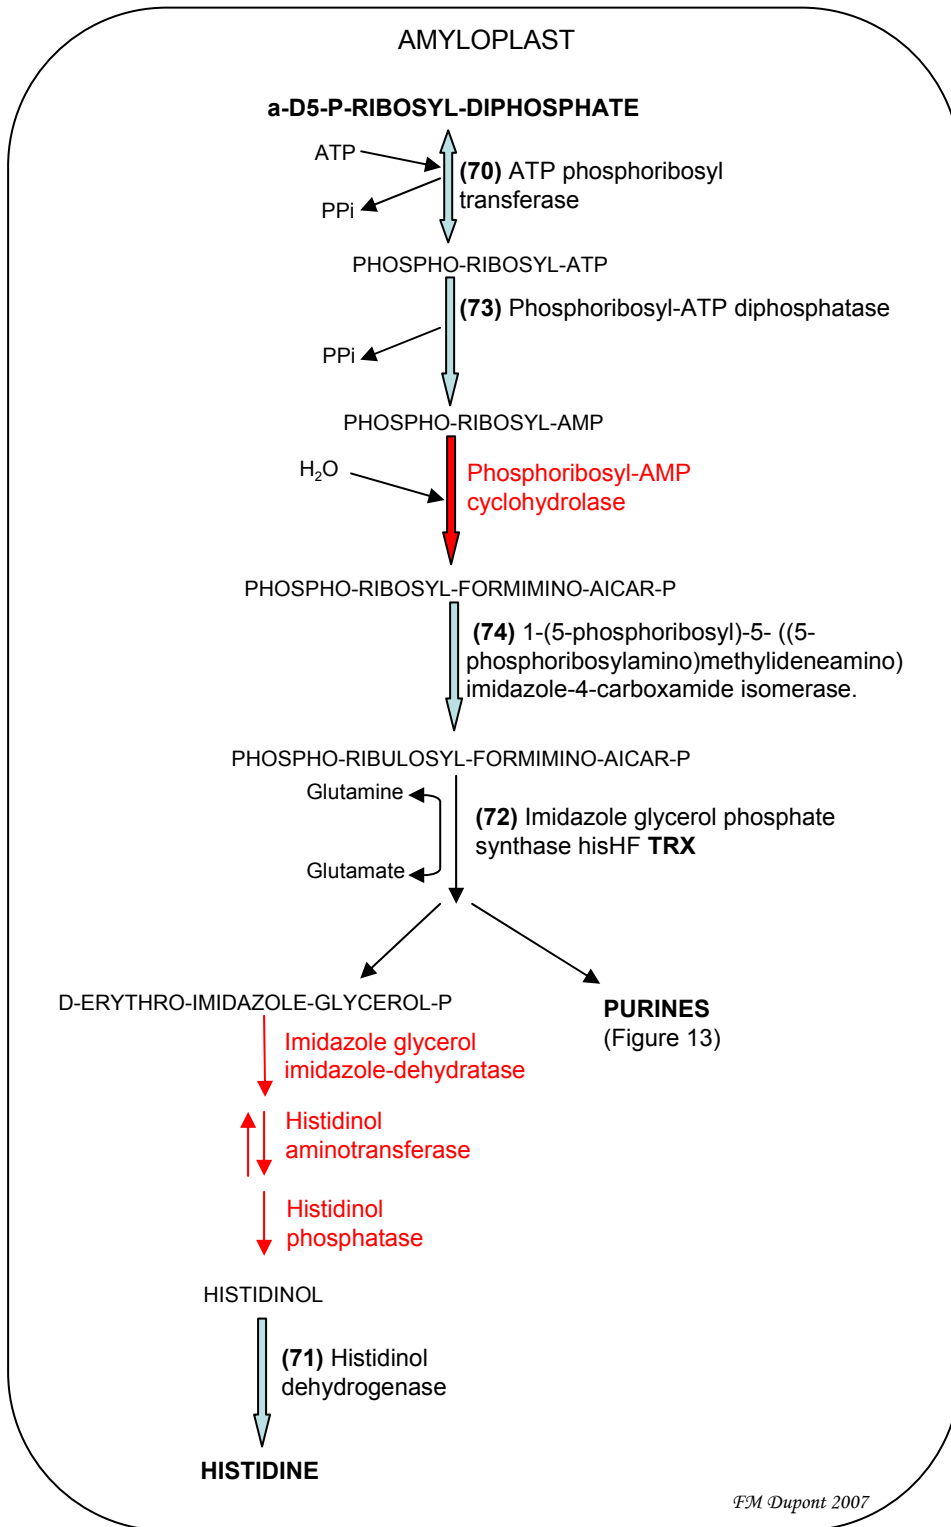

**Figure 12. Histidine synthesis.**

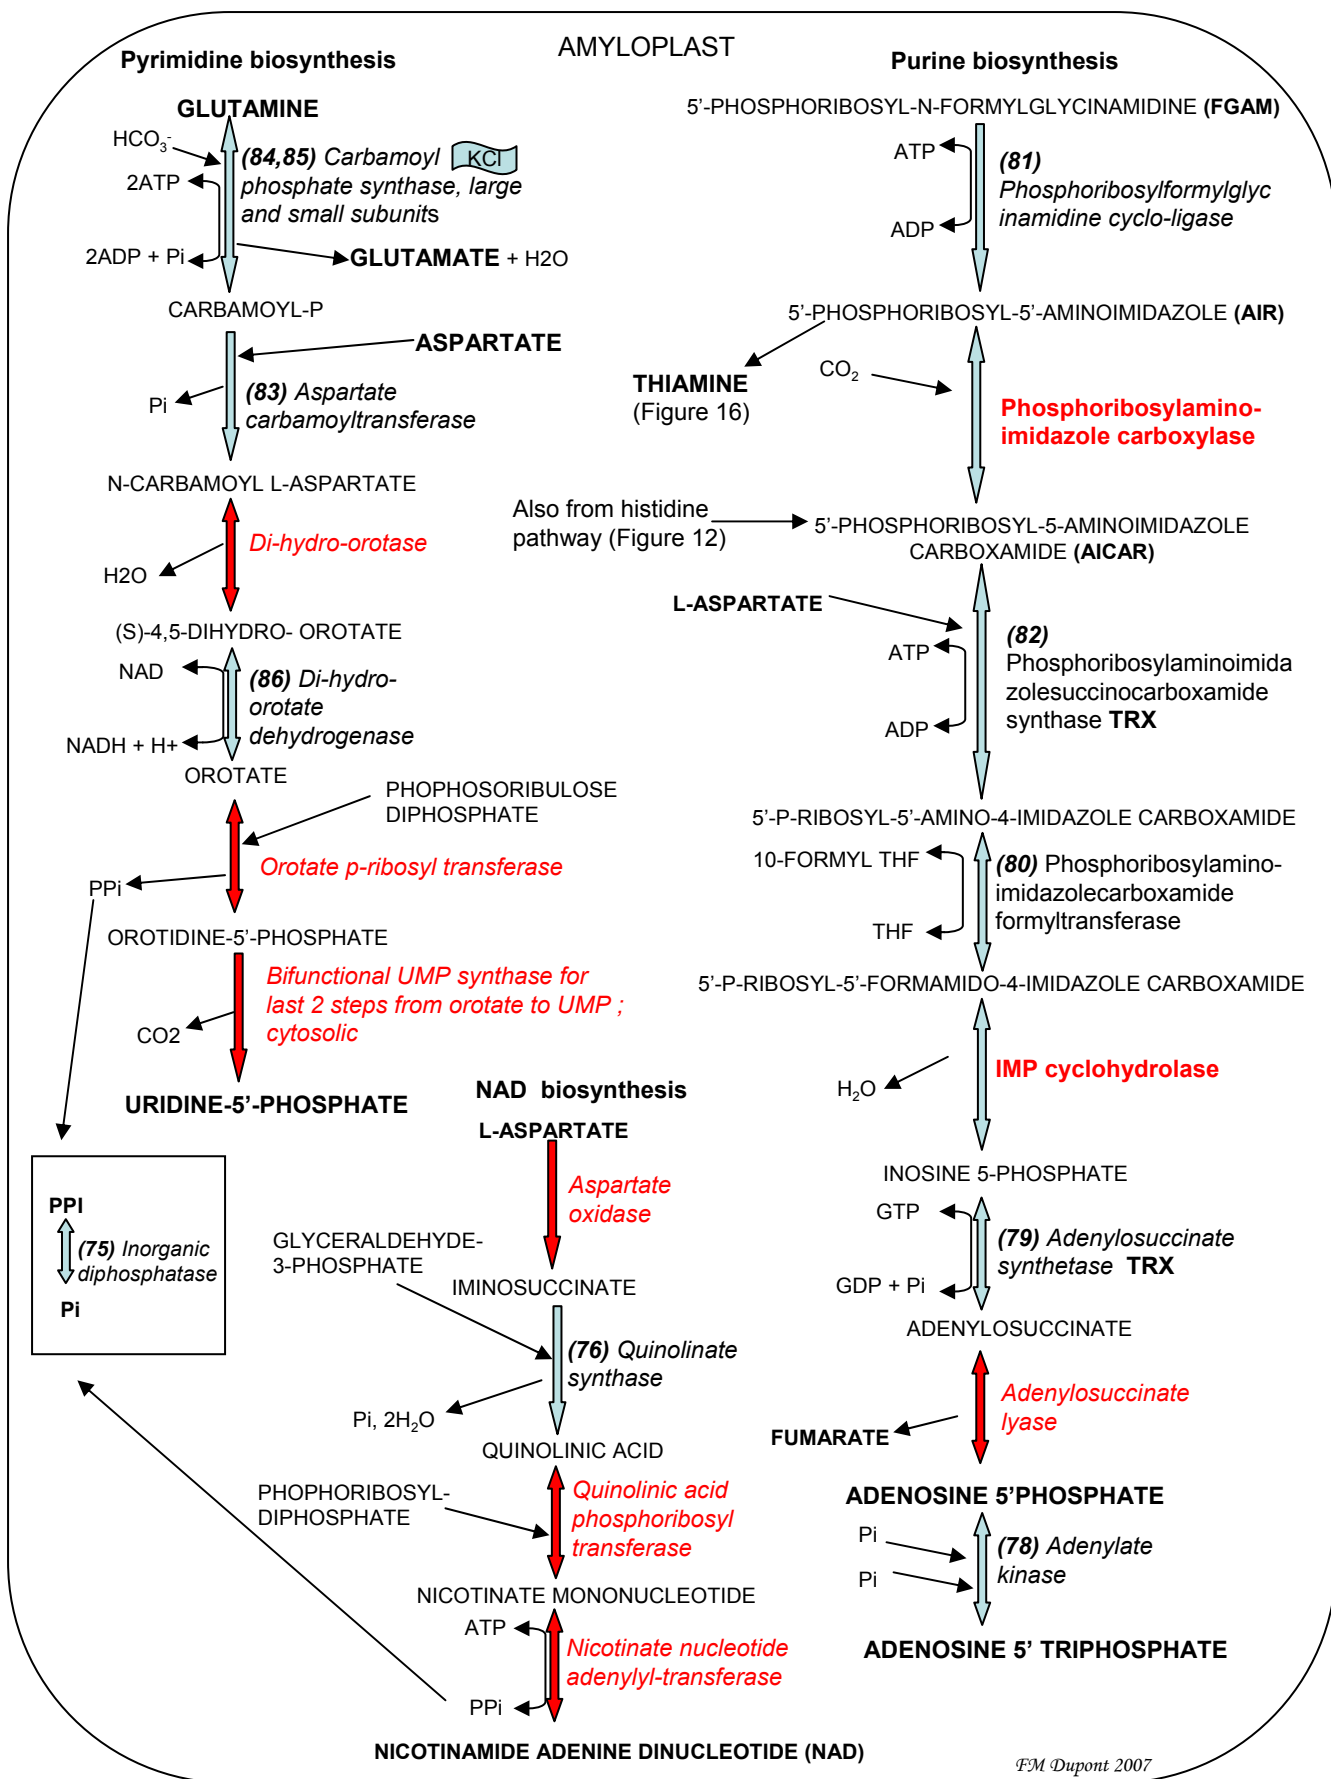

Figure 13. Nucleic acid synthesis.

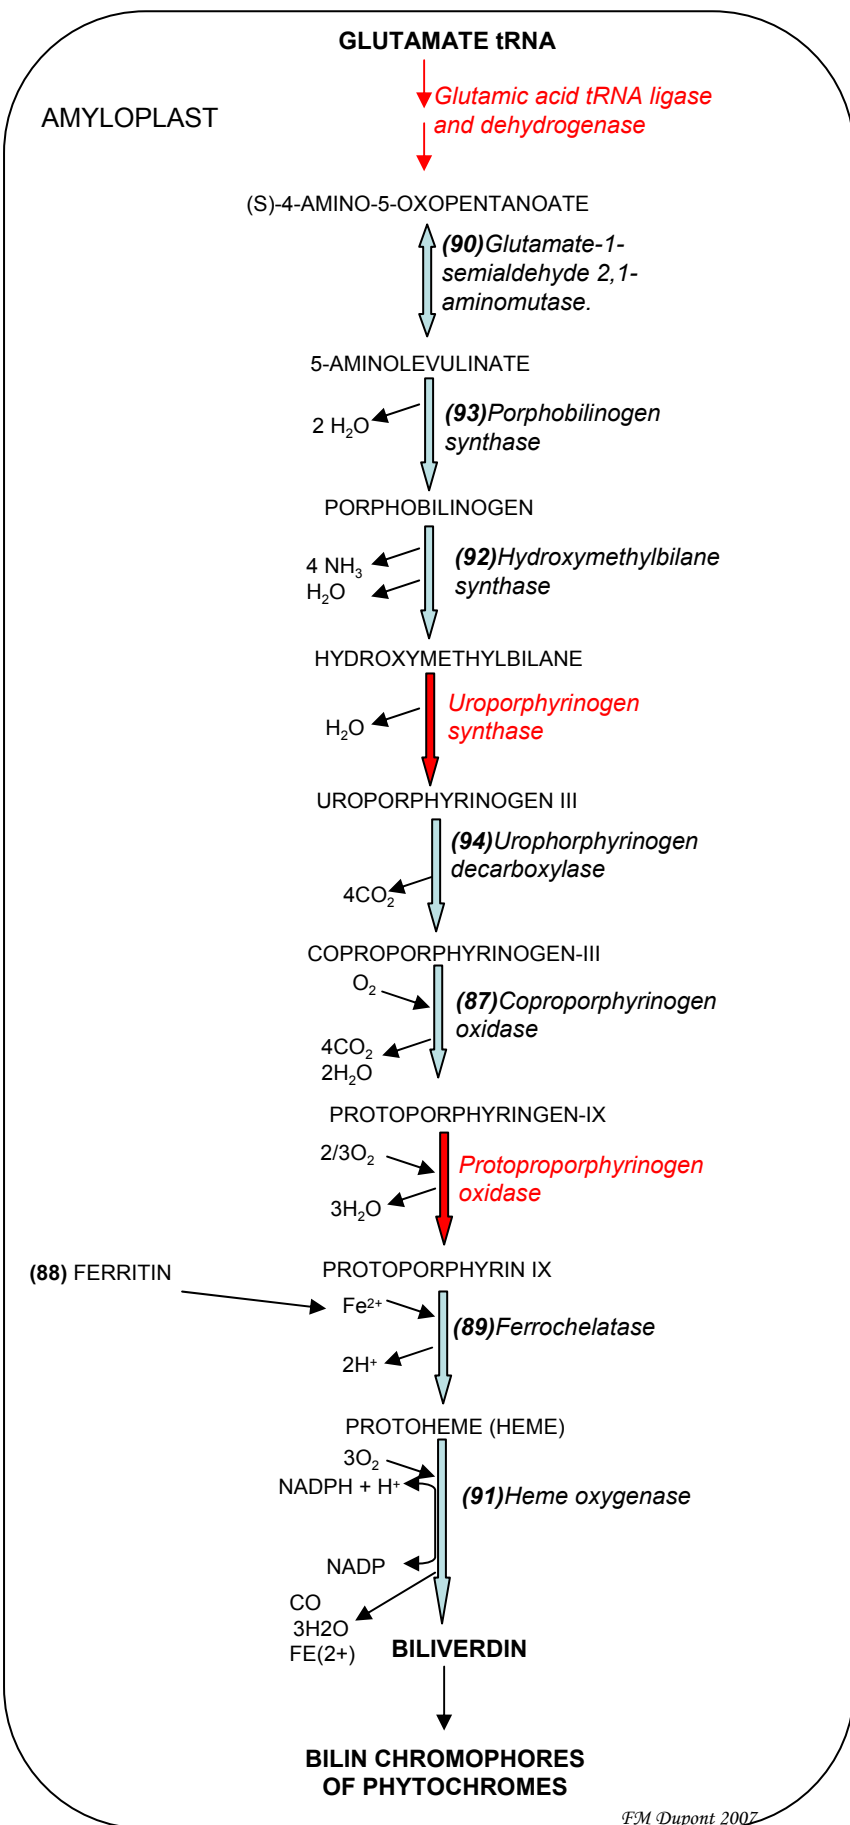

F<sub>M</sub> Dupont 2007

Figure 14. Porphyrin synthesis.

## Isoprenoid Biosynthesis Part I: Non-mevalonate Pathway

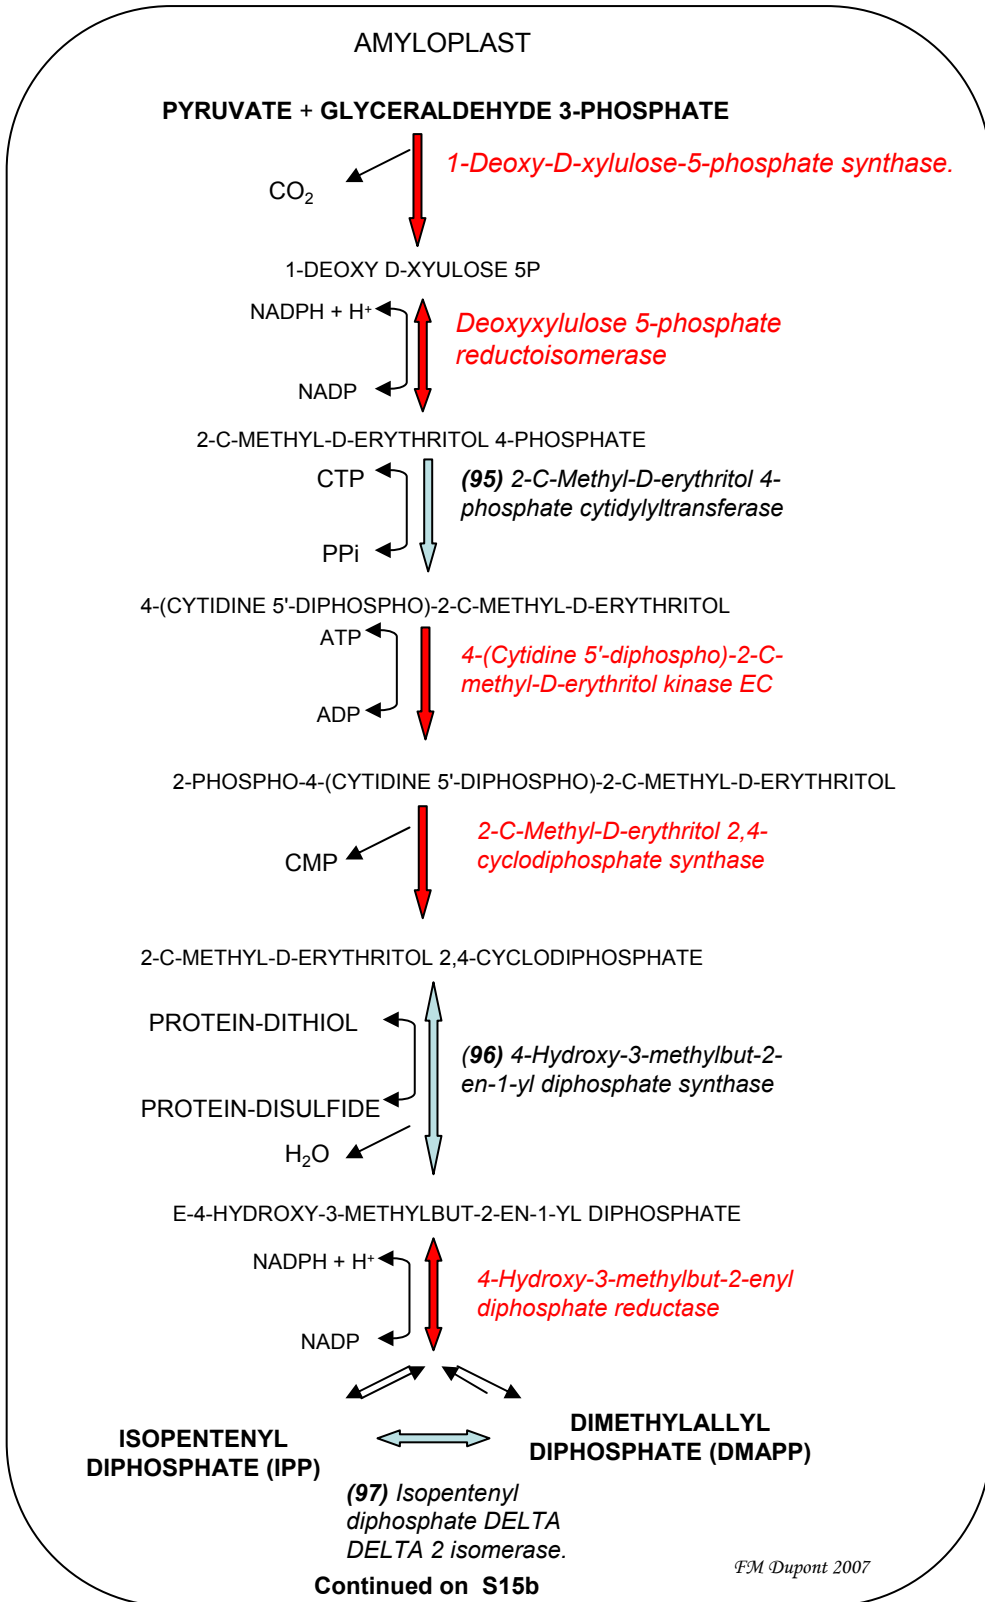

Figure 15a. Isoprenoid synthesis I, Non-mevalonate pathway.

## Isoprenoid Biosynthesis II

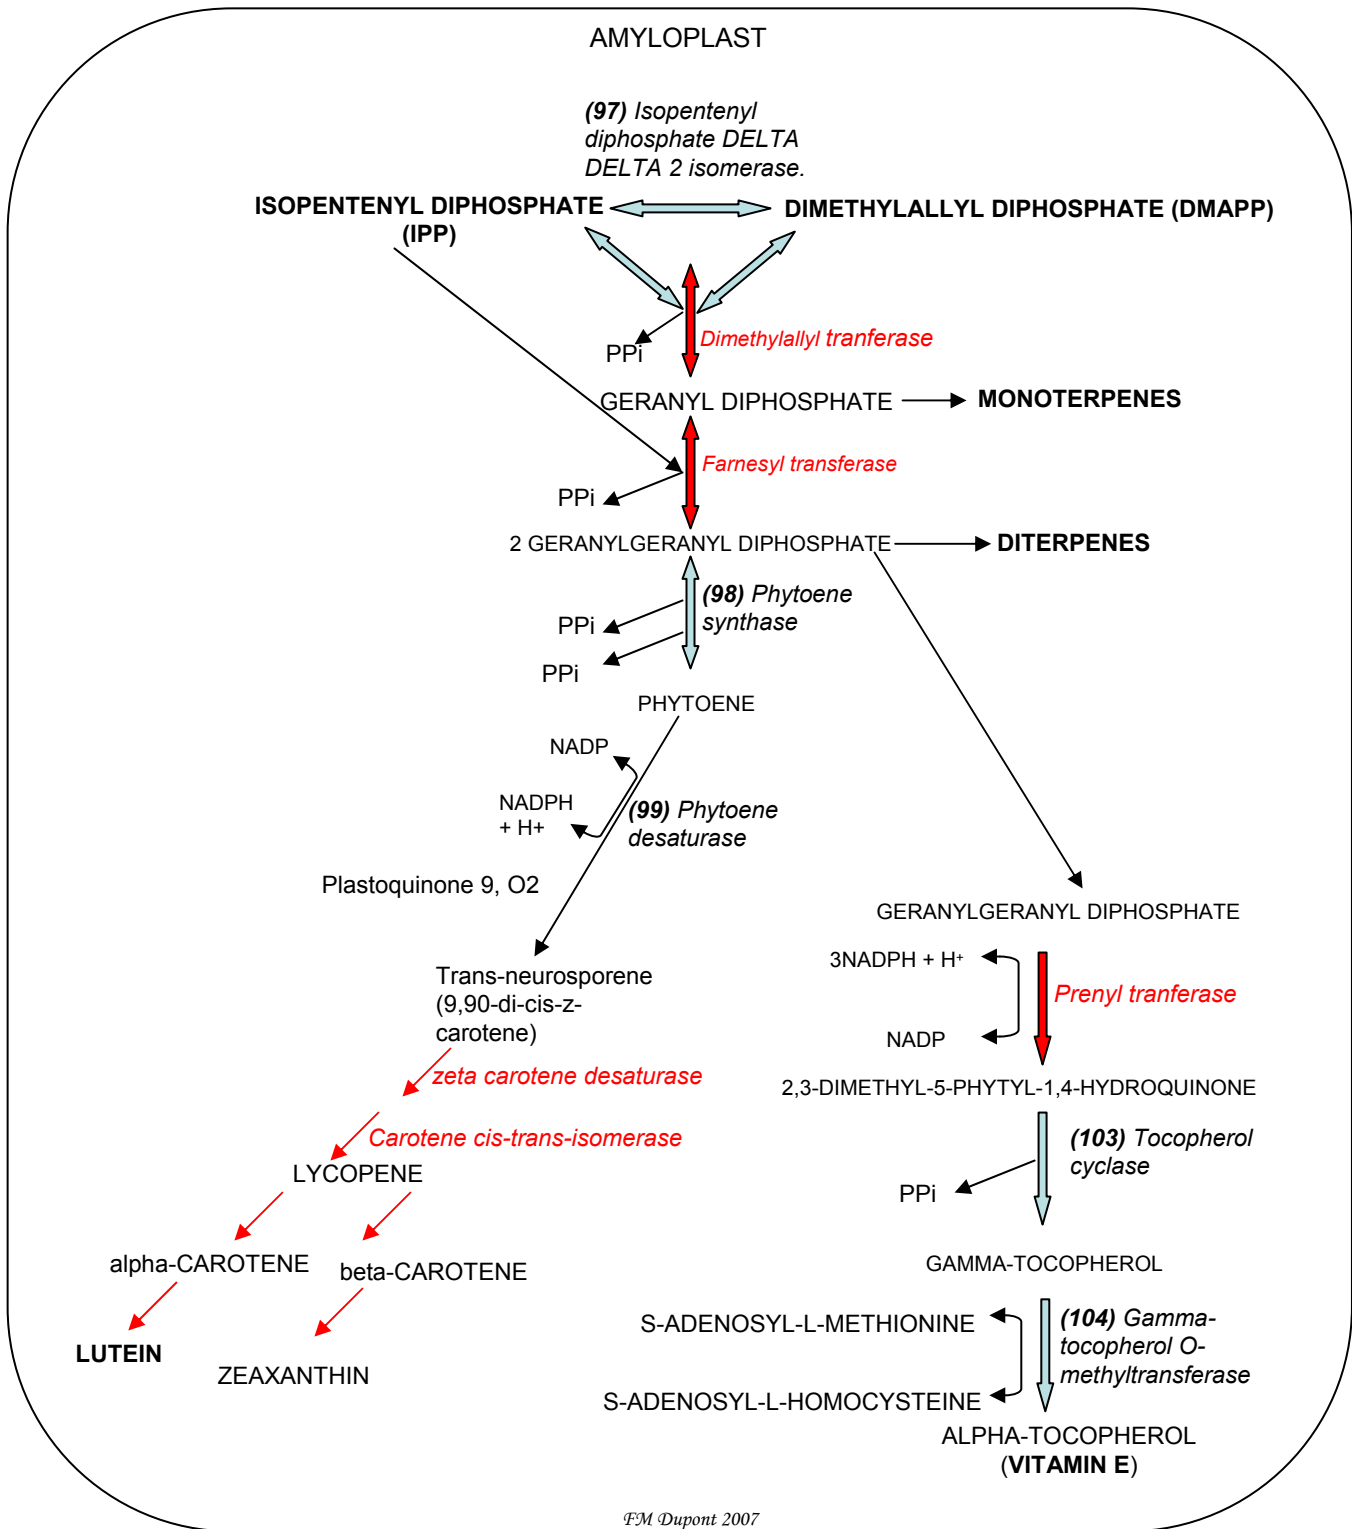

Figure 15b. Isoprenoid synthesis II.

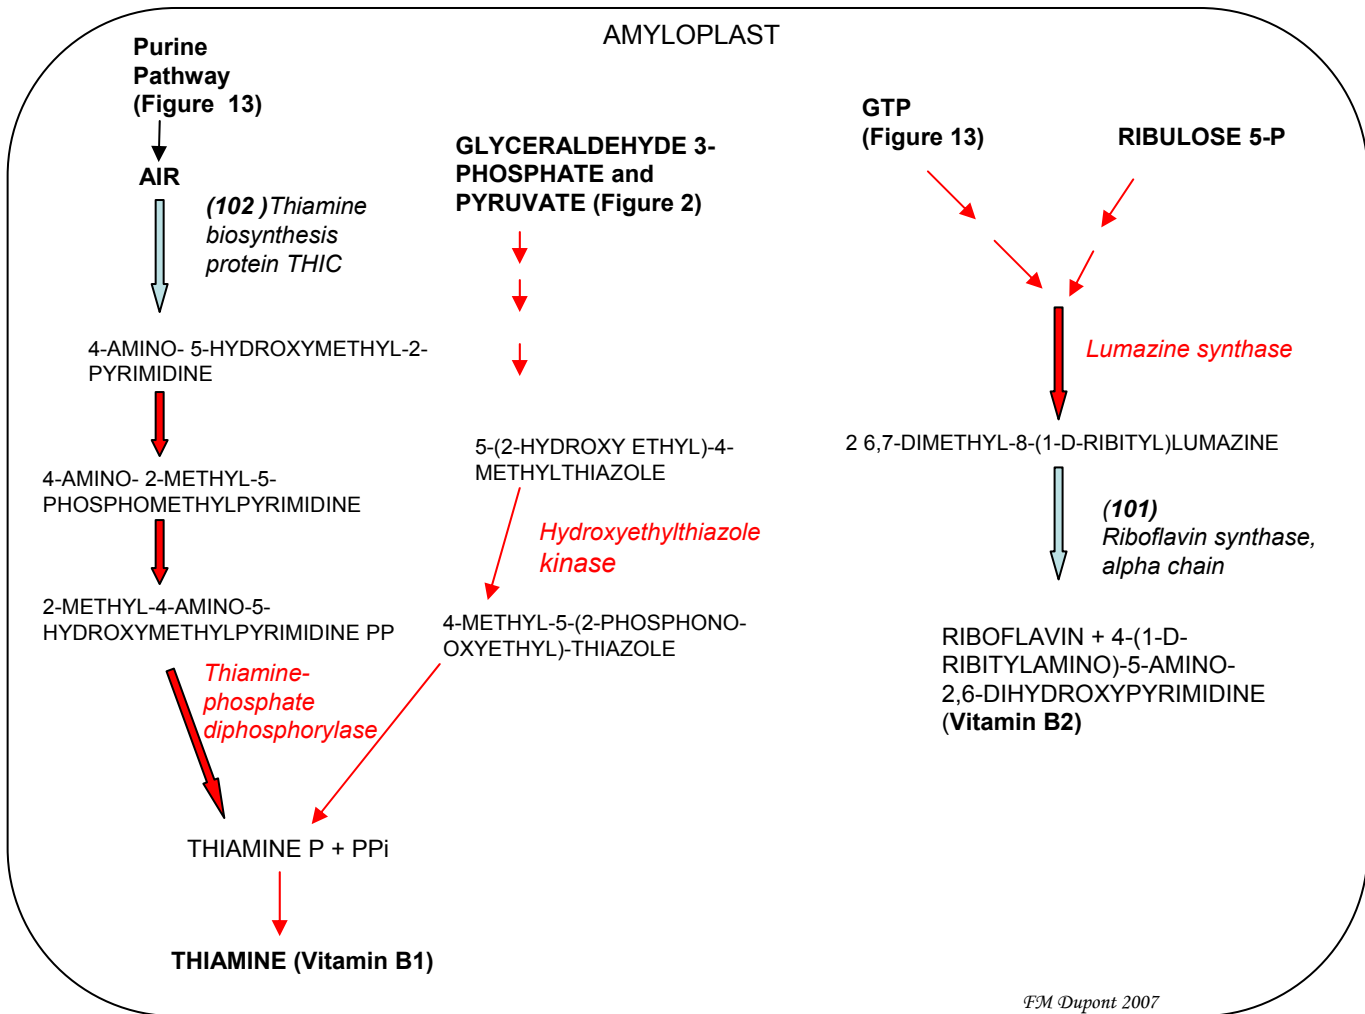

**Figure 16. Vitamin and cofactor synthesis, nucleic acid-related pathways.**

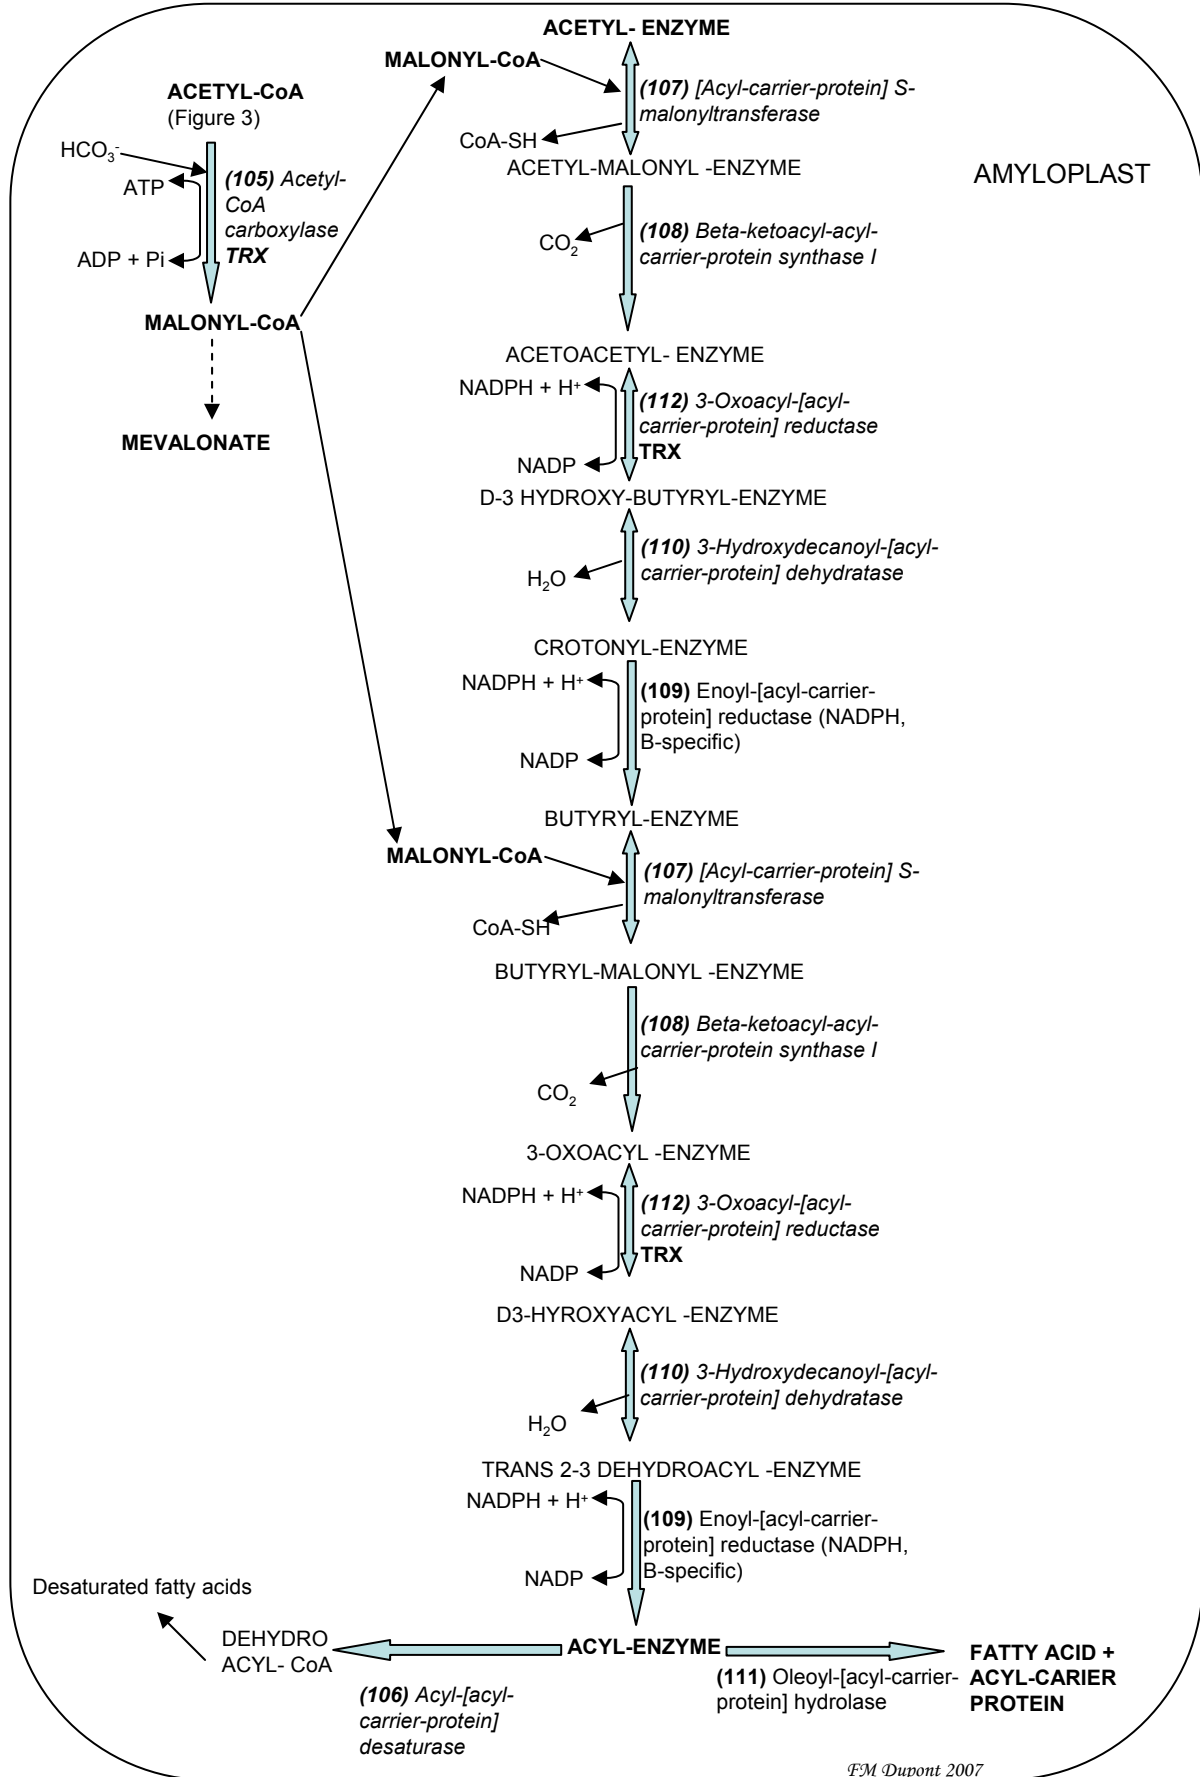

FM Dupont 2007

**Figure 17. Fatty Acid Synthesis.** Only 2 cycles from addition of malonyl-CoA to formation of the acyl-enzyme are shown. Multiple cycles are needed to form 16 and 18 carbon fatty acids.
